# Supplementary material for: Direct aerobic epoxidation of alkenes catalyzed by metal nanoparticles stabilized by the H5PV2Mo10O40 polyoxometalate
Source: Royal Society of Chemistry journal article supplement (doi:10.1039/b507411h), 2005-01-01
Supplement: b507411h.pdf [file b507411h.pdf]

## Supplementary Information- Detailed Experimental Section

### Instrumentation

Transmission electron micrographs were taken on a Philips CM120 Super Twin 120kV electron microscope with a LaB6 electron source. The spherical nature of the particles was tested by tilting the samples by  $\pm 40^\circ$ . EDS measurements were made using retractable Si(Li) detector with super ultra thin window; the point resolution was 3.0 Å. IR spectra were measured on a Nicolet Protégé 460 FTIR spectrometer prepared as ~5% catalysts in KBr pellets. . Isotope incorporation in substrates and products was measured by GC-MS (HP 5973). Reactions were quantified by GLC (HP 6890) using a 30 m 5% phenylmethyl silicone capillary column with an ID 0.32 mm and 0.25  $\mu\text{m}$  coating (Restek 5MS). The identity of the products was verified by use of reference standards and/or GC-MS (HP 5973) using a 30 m 5% phenylmethyl silicone capillary column with an ID 0.25 mm and 0.25  $\mu\text{m}$  coating (Restek 5MS).

### Preparation of metal nanoparticles.

A 10 mM solution of  $\text{H}_5\text{PV}_2\text{Mo}_{10}\text{O}_{40} \cdot 32\text{H}_2\text{O}$  (Tsigdinos, G. A.; Hallada, C. J. *Inorg. Chem.* 1968, 7, 437.) in deionized water was treated with a 100 fold excess of Zn powder under argon. When the color of the solution turned blue after a few minutes, the solution was filtered under argon and diluted to 1 mM reduced  $\text{ZnH}_5\text{PV}_2\text{Mo}_{10}\text{O}_{40}$ .

$\text{Ag}_n\text{-ZnH}_3\text{PV}_2\text{Mo}_{10}\text{O}_{40}$ . 2.5 mL of 1 mM  $\text{ZnH}_5\text{PV}_2\text{Mo}_{10}\text{O}_{40}$  was treated in a bath sonicator with 0.5 mL 10 mM  $\text{AgNO}_3$  in acetonitrile. After 10 minutes the color of the solution turned to yellow and remained clear indicating the re-oxidation of the polyoxometalate and the formation of  $\text{Ag}(0)$  nanoparticles. The solution can be stored under ambient conditions without apparent degradation for days. TEM analysis showed colloids with an average size of 5 nm.

$\text{Ru}_n\text{-ZnH}_3\text{PV}_2\text{Mo}_{10}\text{O}_{40}$ . 2.5 mL of 1 mM  $\text{ZnH}_5\text{PV}_2\text{Mo}_{10}\text{O}_{40}$  was treated in a bath sonicator with 0.25 mL 10 mM  $\text{RuCl}_2(\text{DMSO})_4$  in 1:1  $\text{H}_2\text{O}/\text{CH}_3\text{CN}$ . After 10 minutes the color of the solution turned to dark yellow indicating the re-oxidation of the polyoxometalate and the formation of  $\text{Ru}(0)$  nanoparticles. The solution can be stored under ambient conditions without apparent degradation for several days. TEM analysis showed colloids with an average size of 5 nm.

$\text{Pt}_n\text{-ZnH}_3\text{PV}_2\text{Mo}_{10}\text{O}_{40}$ . 2.5 mL of 1 mM  $\text{ZnH}_5\text{PV}_2\text{Mo}_{10}\text{O}_{40}$  was treated in a bath sonicator with 0.25 mL 10 mM  $\text{K}_2[\text{PtCl}_4]$  in 1:1  $\text{H}_2\text{O}/\text{CH}_3\text{CN}$ . After 10 minutes the color of the solution turned to dark yellow indicating the re-oxidation of the polyoxometalate and the formation of  $\text{Pt}(0)$  nanoparticles. The solution can be stored under ambient conditions without apparent degradation for several days. TEM analysis showed colloids with an average size of 2.7 nm.

### Preparation of metal nanoparticles supported on $\alpha$ -alumina.

$\alpha$ -alumina was pre-treated by stirring 510 mg  $\alpha$ -alumina with a solution of 7 mg  $\text{NaHCO}_3$  in 5 mL  $\text{H}_2\text{O}$  at  $50^\circ\text{C}$ . After 2 hours the water was removed under high vacuum. The nanoparticle solutions were mixed  $\alpha$ -alumina at a computed 5% w/w ratio at room temperature for two hours. The solvent was then removed under vacuum and the supported catalyst was dried overnight at  $80^\circ\text{C}$  and stored at room temperature in amber vials. The colors of the various  $\text{M}_n\text{-ZnH}_3\text{PV}_2\text{Mo}_{10}\text{O}_{40}/\text{Al}_2\text{O}_3$  materials ranged from yellow-green for  $\text{Ag}_n\text{-ZnH}_3\text{PV}_2\text{Mo}_{10}\text{O}_{40}/\text{Al}_2\text{O}_3$ , yellow brown for  $\text{Ru}_n\text{-ZnH}_3\text{PV}_2\text{Mo}_{10}\text{O}_{40}/\text{Al}_2\text{O}_3$  and grayish for  $\text{Pt}_n\text{-ZnH}_3\text{PV}_2\text{Mo}_{10}\text{O}_{40}/\text{Al}_2\text{O}_3$ .

### General procedure for the oxidation reactions.

Reactions were carried out in 25 mL glass pressure tubes in a preheated thermostated oil bath ( $\pm 2^\circ\text{C}$ ). Thus, typically 0.5 mmol alkene substrate, 15 mg (5% w/w)  $\text{M}_n\text{-ZnH}_3\text{PV}_2\text{Mo}_{10}\text{O}_{40}/\alpha\text{-Al}_2\text{O}_3$ , 0.05 mmol anisole (internal standard) and 0.5 mL trifluoromethylbenzene (solvent) were reacted under 2 atm  $\text{O}_2$  at the given reaction temperature and time. After cooling the solution, the reaction solutions were quantified by GC after preparation of calibration curves (alkene/internal standard). Products were identified via authentic reference standards and/or GC-MS.
